# Bounds to Parapatric Speciation: A Dobzhansky-Muller incompatibility model involving autosomes, X chromosomes and mitochondria

Ilse Höllinger<sup>1,2</sup> and Joachim Hermisson<sup>1</sup>

<sup>1</sup>Mathematics and BioSciences Group, Faculty of Mathematics and  
Max F. Perutz Laboratories, University of Vienna, 1090 Vienna,  
Austria

<sup>2</sup>Vienna Graduate School of Population Genetics, Vienna Austria

February 3, 2017

**Postal address:**

Joachim Hermisson and Ilse Höllinger  
Faculty of Mathematics, University of Vienna  
Oskar-Morgenstern-Platz 1  
1090 Wien, Austria  
Europe

**Telephone number:**

+43/1/4277 50648 (J. Hermisson)  
+43/1/4277 50771 (I. Höllinger)

**Email-adress:**

joachim.hermisson@univie.ac.at  
ilse.hoellinger@univie.ac.at

**Key words:**

hybrid incompatibility, two-locus DMI, speciation-with-gene-flow, large X-effect, introgression on X and autosomes

## **Word count**

excluding tables, figures and their captions, and literature cited:

Title: 15 words

—

Abstract: 172 words

Introduction: 650 words

Model and Methods: 1389 words

Results: 2466 words

Discussion: 2713 words

—

Sum: 7390 words

—

## Abstract

1  
2 We investigate the conditions for the origin and maintenance of postzygotic  
3 isolation barriers, so called (Bateson-)Dobzhansky-Muller incompatibilities or  
4 DMIs, among populations that are connected by gene flow. Specifically, we  
5 compare the relative stability of pairwise DMIs among autosomes, X chromosomes,  
6 and mitochondrial genes. In an analytical approach based on a continent-island  
7 framework, we determine how the maximum permissible migration rates depend  
8 on the genomic architecture of the DMI, on sex bias in migration rates, and on  
9 sex-dependence of allelic and epistatic effects, such as dosage compensation.  
10 Our results show that X-linkage of DMIs can enlarge the migration bounds  
11 relative to autosomal DMIs or autosome-mitochondrial DMIs, in particular in  
12 the presence of dosage compensation. The effect is further strengthened with  
13 male-biased migration. This mechanism might contribute to a higher density  
14 of DMIs on the X chromosome (large X-effect) that has been observed in  
15 several species clades. Furthermore, our results agree with empirical findings  
16 of higher introgression rates of autosomal compared to X-linked loci.

## 17 **1 Introduction**

18 Historically, speciation research has mostly focused on two idealized scenarios: allopatric  
19 speciation (complete geographic isolation of incipient species) and sympatric speciation  
20 (divergence of subpopulations in a common habitat) (Orr and Turelli, 2001; Coyne  
21 and Orr, 2004; Via and West, 2008). Both scenarios are simplifications of biological  
22 reality. While strict sympatry of incipient species seems to be an exception, there is  
23 abundant evidence for hybridization even among “good species” with viable and not  
24 completely sterile hybrid offspring (reviewed *e.g.* in Coyne and Orr, 2004; Mallet,  
25 2008). Population genetic theory shows that even low levels of gene flow can strongly  
26 interfere with population differentiation (Felsenstein, 1981; Slatkin, 1987). This  
27 makes it inevitable to assess the impact of limited gene flow at various stages of the  
28 speciation process, a scenario commonly referred to as parapatric speciation.

29 The classical model for the evolution of postzygotic isolation barriers in allopatry  
30 is the (Bateson-)Dobzhansky-Muller model (DMM) (Bateson, 1909; Dobzhansky,  
31 1936; Muller, 1942). The DMM assumes that new substitutions occur on different  
32 genetic backgrounds. When brought into secondary contact, these previously untested  
33 alleles might be mutually incompatible and form Dobzhansky-Muller incompatibilities  
34 (DMIs), thus reducing hybrid fitness and decreasing gene flow at linked sites. The  
35 emergence of species boundaries due to accumulation of DMIs in allopatry is well  
36 understood (Coyne and Orr, 1989; Orr and Turelli, 2001; Coyne and Orr, 2004).  
37 More recently, several studies have considered this process in parapatry (Gavrilets,  
38 1997; Feder and Nosil, 2009; Agrawal et al., 2011; Bank et al., 2012; Wang, 2013;  
39 Lindtke and Buerkle, 2015). All support that the DMM provides a viable mechanism  
40 for the evolution of postzygotic isolation even in the presence of gene flow, although  
41 the bounds for maximum permissible migration rates can be quite stringent.

42 Empirically, there is widespread evidence for DMIs not only among recently  
43 diverged sister species (Maheshwari and Barbash, 2011; Presgraves, 2010; Sweigart

44 and Flagel, 2014), but also segregating within species (Corbett-Detig et al., 2013).  
45 Hence, these authors argue that the genetic basis of reproductive isolation is continuously  
46 present within natural populations, rendering the independent allopatric evolution  
47 of newly incompatible substitutions obsolete.

48 While most theoretical studies focus on autosomal DMIs, empirical evidence  
49 points to a major role of sex chromosomes in speciation. Haldane's rule (Haldane,  
50 1922, reviewed in Coyne and Orr, 2004), states that in species with sex specific  
51 reduced hybrid fitness the affected sex is generally heterogametic. The *large X-effect*  
52 (Coyne and Orr, 1989, reviewed in Presgraves, 2008) expresses the disproportional  
53 density of X-linked incompatibility genes in postzygotic isolation. For example  
54 Masly and Presgraves (2007) report a higher density of incompatibilities causing  
55 hybrid male sterility on the X chromosome relative to autosomes in *Drosophila*.  
56 Equivalent findings exist of a *large Z-effect* in WZ-systems, such as birds, where  
57 WZ-females are heterogametic (Ellegren, 2009). Also cytoplasmic incompatibilities  
58 have been described (Ellison and Burton, 2008; Lee et al., 2008; Burton and Barreto,  
59 2012; Barnard-Kubow et al., 2016).

60 A recent study by Bank et al. (2012) determined stability conditions and maximum  
61 permissible migration rates of autosomal two-locus DMIs in a continent-island framework.  
62 They distinguished two main mechanisms shaping the evolution of DMIs: selection  
63 against (maladapted) immigrants and selection against (unfit) hybrids, which lead  
64 to different dependence of maximum migration rates on the model parameters.

65 Prompted by the empirical observations described above, we extend the model by  
66 Bank et al. (2012) to general two-locus DMIs in diploids involving X chromosomes,  
67 autosomes, or mitochondria. We include sex-specific fitness effects, in particular,  
68 to account for the effect of dosage compensation of hemizygous X-linked genes in  
69 males. We also allow for sex-specific migration, as many species display differences  
70 in migration patterns for males and females Greenwood (1980).

71 Following Bank et al. (2012) we derive maximum migration bounds where DMIs

72 can still originate in parapatry, or resist continental gene flow. In contrast to  
73 the autosomal case, we find that sex specific fitness- and sex-biased migration  
74 cause substantial differences in the maximum permissible rates and hence influence  
75 the prevalence of autosomal DMIs relative to X-linked and mitochondrial DMIs.  
76 Especially, we find that X-linkage of (nuclear or cytonuclear) DMIs together with  
77 dosage compensation and/or male-biased migration boosts migration bounds and  
78 thus enhances the evolution of X-linked DMIs, possibly contributing to a *large*  
79 *X-effect* and to reduced introgression probabilities of X-linked DMI loci.

## 80 2 Model and Methods

81 We consider a diploid, dioecious population with separate sexes (at 1:1 ratio) that  
82 is divided into two panmictic subpopulations, continent and island. (See Figure 1  
83 and Figure B.1 in the Supporting Information (SI)). Both demes are sufficiently  
84 large that drift can be ignored (drift effects are discussed in SI Section A.3). They  
85 are connected by unidirectional sex-dependent migration at rate  $m^{\text{♀}}$  and  $m^{\text{♂}}$  from  
86 the continent to the island. We fix the average migration rate per individual,  $m =$   
87  $\frac{m^{\text{♀}} + m^{\text{♂}}}{2}$ , and define

$$R := \frac{m^{\text{♀}} - m^{\text{♂}}}{m^{\text{♀}} + m^{\text{♂}}} \in [-1, 1] \quad (1)$$

88 as a measure of sex-bias in migration. Sex-specific migration gives rise to distinct  
89 migration rates per allele for autosomes, X chromosomes, and mitochondria,  $m_{\mathcal{A}}$ ,  
90  $m_{\mathcal{X}}$ , and  $m_{\mathcal{O}}$  (Eqs. (B.13)-(B.15)). For  $-1 \leq R < 0$  migration is male-biased and  
91 we obtain  $m_{\mathcal{A}} > m_{\mathcal{X}} > m_{\mathcal{O}}$ . In contrast, for  $0 < R \leq 1$  migration is female-biased,  
92 resulting in  $m_{\mathcal{A}} < m_{\mathcal{X}} < m_{\mathcal{O}}$ .

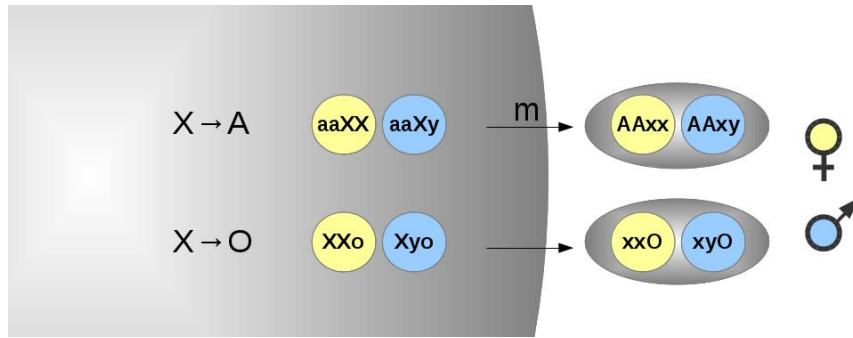

Figure 1: **Schematic model.** The population inhabits a continent (left) and an island (right), which are connected by unidirectional migration at rate  $m$ . The figure shows two out of eight genomic architectures investigated: an X-autosome DMI (upper line) and a cytoplasmic DMI between X and mitochondrion (lower line). Genotypes of female residents are depicted by yellow circles and males by blue circles, respectively. The capital letters denote incompatible alleles, which reduce hybrid fitness.

### 93 The DMI

94 The incompatibility is formed by two unlinked biallelic loci, situated on autosomes  
 95  $\mathcal{A}$ , X chromosomes  $\mathcal{X}$ , or in the mitochondrial genome (cytoplasmic organelle)  $\mathcal{O}$ ,  
 96 (cf. Table 1). Both sexes are diploid for autosomes and haploid for the mitochondrial  
 97 locus. Males are hemizygous for the X chromosomes, whereas females are diploid.  
 98 The continent is monomorphic for the continental (geno-)type and only acts as source  
 99 of migrants for the island. Our analysis focuses on the evolutionary dynamics on  
 100 the island. A stable DMI corresponds to a stable equilibrium on the island where  
 101 all four alleles are maintained (a two-locus polymorphism), including the pair of  
 102 incompatible alleles (indicated by capital letters in Table 1).

103 We model genotypic fitness as the sum of direct allelic fitness and epistasis. Hence  
 104 any given allele contributes directly to genotype fitness, where it can be locally or  
 105 globally adapted, and additionally via epistasis if it is incompatible with other alleles  
 106 in the same genotype. We set the (Malthusian) fitness of genotypes containing no  
 107 incompatible alleles (only lower case letters) in both sexes to 0. For simplicity, we  
 108 assume no dominance of the single-locus effects, but we allow for dominance or

## Different genomic architectures of DMIs.

| Model | DMI                       | continental type ( $\varphi, \sigma^{\varphi}$ ) | island type ( $\varphi, \sigma^{\varphi}$ ) |
|-------|---------------------------|--------------------------------------------------|---------------------------------------------|
| A→A   | $\mathcal{A}-\mathcal{A}$ | aaBB                                             | AAbb                                        |
| X→A   | $\mathcal{A}-\mathcal{X}$ | aaXX, aaXy                                       | AAxx, AAxy                                  |
| A→X   | $\mathcal{A}-\mathcal{X}$ | AAxx, AAxy                                       | aaXX, aaXy                                  |
| X→X   | $\mathcal{X}-\mathcal{X}$ | $X_1X_1x_2x_2, X_1x_2y$                          | $x_1x_1X_2X_2, x_1X_2y$                     |
| A→O   | $\mathcal{A}-\mathcal{O}$ | AAo                                              | aaO                                         |
| O→A   | $\mathcal{A}-\mathcal{O}$ | aaO                                              | AAo                                         |
| X→O   | $\mathcal{X}-\mathcal{O}$ | XXo, Xyo                                         | xxO, xyO                                    |
| O→X   | $\mathcal{X}-\mathcal{O}$ | xxO, xyO                                         | XXo, Xyo                                    |

Table 1: Each genomic architecture is defined by a continental (geno-)type (third column) and an island (geno-)type (fourth column). Mutually incompatible pairs of DMI-alleles are denoted by capital letters. We call the immigrating DMI-allele *continental allele* and its resident incompatible partner *island allele*. The name of each model in the first column is constituted by “the continental allele → the island allele”. The A→A-model corresponds to the model by Bank et al. (2012).

109 recessitivity of the incompatibility.

110 We define the fitness of an arbitrary female genotype as

$$\omega(G^{\varphi}) = \underbrace{n_C \cdot \sigma_C^{\varphi} + n_I \cdot \sigma_I^{\varphi}}_{\text{allelic fitness}} - \underbrace{\Gamma_*(G^{\varphi})}_{\text{epistasis}} \quad (2)$$

111 or for a male genotype as

$$\omega(G^{\sigma}) = n_C \cdot \sigma_C^{\sigma} + n_I \cdot \sigma_I^{\sigma} - \Gamma_*(G^{\sigma}). \quad (3)$$

112 The allelic fitness is captured by the selection coefficient  $\sigma^{\varphi}, \sigma^{\sigma}$  (for females and  
 113 males) and weighted with the respective number of incompatible alleles,  $n_{C,I} \in$   
 114  $\{0, 1, 2\}$  in a given genotype. To match the locus effects of haploid mitochondrial  
 115 genes to autosomes, we set  $n_{C,I} \in \{0, 2\}$  for the absence or presence of the single  
 116 incompatible allele in this case.



117 We assume  $\sigma^{\sigma} = \sigma^{\varphi}$  for autosomes and organelles, but for X-linked alleles the fitness  
 118 effect may be enhanced in males,  $\sigma^{\sigma} = (1 + D)\sigma^{\varphi}$ , where  $D \in \{0, 1\}$  measures  
 119 dosage compensation (see below). The contribution of epistasis to hybrid genotype  
 120 fitness can be summarized by an epistasis vector  $\Gamma_*$ , for each model (\*), detailed in  
 Table 2

### Strength of the incompatibility: The epistasis vector

| DMI                       | hybrids: $\varphi, \sigma$                                                                      | epistasis vector $\Gamma_*$                                                                                                                             |
|---------------------------|-------------------------------------------------------------------------------------------------|---------------------------------------------------------------------------------------------------------------------------------------------------------|
| $\mathcal{A}-\mathcal{A}$ | $\varphi$ : AaBb, AaBB, AABb, AABB<br>$\sigma$ : AaBb, AaBB, AABb, AABB                         | $\Gamma_{\mathcal{A}\mathcal{A}} = (\underbrace{\gamma_1, \gamma, \gamma, 2\gamma}_{\varphi}, \underbrace{\gamma_1, \gamma, \gamma, 2\gamma}_{\sigma})$ |
| $\mathcal{A}-\mathcal{X}$ | $\varphi$ : AaXx, AaXX, AAXx, AAXX,<br>$\sigma$ : AaXy, AAXy                                    | $\Gamma_{\mathcal{A}\mathcal{X}} = (\gamma_1, \gamma, \gamma, 2\gamma, (1 + D)\frac{\gamma}{2}, (1 + D)\gamma)$                                         |
| $\mathcal{X}-\mathcal{X}$ | $\varphi$ : $X_1x_1X_2x_2, X_1x_1X_2X_2$<br>$X_1X_1X_2x_2, X_1X_1X_2X_2$ , $\sigma$ : $X_1X_2y$ | $\Gamma_{\mathcal{X}\mathcal{X}} = (\gamma_1, \gamma, \gamma, 2\gamma, (1 + 3D)\frac{\gamma}{2})$                                                       |
| $\mathcal{A}-\mathcal{O}$ | $\varphi$ : AaO, AAO, $\sigma$ : AaO, AAO                                                       | $\Gamma_{\mathcal{A}\mathcal{O}} = (\gamma, 2\gamma, \gamma, 2\gamma)$                                                                                  |
| $\mathcal{X}-\mathcal{O}$ | $\varphi$ : XxO, XXO, $\sigma$ : XyO                                                            | $\Gamma_{\mathcal{X}\mathcal{O}} = (\gamma, 2\gamma, (1 + D)\gamma)$                                                                                    |

Table 2: The table shows all possible hybrid genotypes with DMIs (second column) and corresponding fitness cost, parametrized by the entries of the epistasis vector (third column). The strength of the incompatibility depends on the number of incompatible alleles in the genotype. Plausibly, the strength increases with the number of incompatible pairs, which can be 1, 2, or 4 (Turelli and Orr, 2000). We focus on two particular epistasis schemes, one with a codominant DMI ( $\gamma_1 = \frac{\gamma}{2}$ ) with fitness cost proportional to the number of incompatible pairs and one with a recessive DMI ( $\gamma_1 = 0$ ) where the fitness cost is zero if there is still a pair of compatible alleles in the genotype. The strength of X-linked incompatibilities in males depends on dosage compensation, captured by  $D \in \{0, 1\}$ .

121

### 122 Dosage compensation

123 Dosage compensation can be related to different mechanisms. For example, in the  
 124 model organism *Drosophila melanogaster* the expression of the X chromosome is  
 125 doubled in males. An alternative mechanism has evolved in mammals, where one X  
 126 chromosome is randomly inactivated in females (Payer and Lee, 2008). Finally, in  
 127 birds dosage compensation seems to be incomplete, as some genes show elevated  
 128 expression levels in homogametic ZZ-males compared to heterogametic females,

129 whereas other genes are dosage compensated (Ellegren et al., 2007; Graves et al.,  
130 2007).

131 Our model allows for arbitrary sex-dependence of allelic and epistatic effects, but  
132 we focus on dosage compensation of the hemizygous X chromosome in males as a  
133 key biological mechanism. We model fitness for any X-linked allele in hemizygous  
134 males in two ways (Charlesworth et al., 1987):

- 135 • *No dosage compensation,  $D = 0$* : A single copy of an X-linked allele has the  
136 same allelic ( $\sigma^{\sigma^{\text{♂}}} = \sigma^{\sigma^{\text{♀}}}$ ) and epistatic effects in hemizygous males as in females.
- 137 • *Full dosage compensation,  $D = 1$* : Hemizyosity of the X chromosome is  
138 compensated in males, and a single X-linked allele has the same effect as a  
139 homozygous pair of X chromosomes in females (allelic selection coefficient:  
140  $\sigma^{\sigma^{\text{♂}}} = 2\sigma^{\sigma^{\text{♀}}}$ ).

141 With random deactivation of X in females we naturally obtain a codominant  
142 DMI in our model since (average) heterozygous fitness is equal to the mean of the  
143 homozygous fitnesses in this case.

#### 144 **Dynamics of the general model**

145 For our analytical treatment, we assume weak evolutionary forces, such that linkage  
146 equilibrium among both loci and Hardy-Weinberg-proportions can be assumed. It  
147 is then sufficient to track the frequencies of the continental allele  $p_C$  and the island  
148 allele  $p_I$  on the island. We test this approximation for stronger selection by numerical  
149 simulations in SI Section A.2.

150 For each genomic architecture (Table 1) we derive a pair of differential equations  
151 in continuous time (see **Box 1**). For the case of an X→A DMI, in particular,  
152  $p_C$  measures the frequency of the incompatible X allele that immigrates from the  
153 continent and  $p_I$  the frequency of the incompatible autosomal allele on the island.

154 We obtain:

$$\begin{aligned}
 \dot{p}_C &= p_C(1 - p_C) \left( \frac{3+D}{3} \sigma_C^{\ominus} + \frac{2}{3} p_I \left( (2p_C(1 - p_I) + p_I)(2\gamma_1 - \gamma) - 2\gamma_1 - \frac{\gamma}{2}(1 + D) \right) \right) \\
 &\quad + (1 - p_C) \left( 1 + \frac{R}{3} \right) m \\
 \dot{p}_I &= p_I(1 - p_I) \left( \sigma_I^{\ominus} + \frac{1}{2} p_C \left( (2p_I(1 - p_C) + p_C)(2\gamma_1 - \gamma) - 2\gamma_1 - \frac{\gamma}{2}(1 + D) \right) \right) \\
 &\quad - p_I m
 \end{aligned} \tag{4}$$

155 We see that with dosage compensation ( $D = 1$ ), the X-linked allelic fitness is  
 156 increased ( $\frac{4}{3} \sigma_C^{\ominus}$ ), because a single X-allele in males now acts as strongly as two  
 157 X-alleles in females. Similarly, dosage compensation increases the term due to  
 158 epistasis in males ( $\frac{\gamma}{2}(1 + D)$ ) affecting both the X-linked allele and the autosomal  
 159 allele. Sex-biased migration, quantified by  $R$  (see Eq. 1), affects only the X-linked  
 160 allele, as males are hemizygous X carriers. Parameterizations for all other cases are  
 161 provided in the SI Section B.1.2.

**Box 1:**

Dynamics of the continental allele frequencies  $p_C$ :

$$\dot{p}_C = \begin{cases} \text{for } \mathcal{A} : & p_C \left( \frac{\omega_C^{*\varnothing} + \omega_C^{*\sigma}}{2} - \frac{\bar{\omega}^{\varnothing} + \bar{\omega}^{\sigma}}{2} \right) & +(1 - p_C)m \\ \text{for } \mathcal{X} : & p_C \left( \frac{2\omega_C^{*\varnothing} + \omega_C^{*\sigma}}{3} - \frac{2\bar{\omega}^{\varnothing} + \bar{\omega}^{\sigma}}{3} \right) & +(1 - p_C) \left( 1 + \frac{R}{3} \right) \cdot m \\ \text{for } \mathcal{O} : & p_C (\omega_C^{*\varnothing} - \bar{\omega}^{\varnothing}) & +(1 - p_C)(1 + R) \cdot m \end{cases}$$

Dynamics of the island allele  $p_I$ :

$$\dot{p}_I = \begin{cases} \text{for } \mathcal{A} : & p_I \left( \frac{\omega_I^{*\varnothing} + \omega_I^{*\sigma}}{2} - \frac{\bar{\omega}^{\varnothing} + \bar{\omega}^{\sigma}}{2} \right) & -p_I m \\ \text{for } \mathcal{X} : & p_I \left( \frac{2\omega_I^{*\varnothing} + \omega_I^{*\sigma}}{3} - \frac{2\bar{\omega}^{\varnothing} + \bar{\omega}^{\sigma}}{3} \right) & -p_I \left( 1 + \frac{R}{3} \right) \cdot m \\ \text{for } \mathcal{O} : & p_I (\omega_I^{*\varnothing} - \bar{\omega}^{\varnothing}) & -p_I (1 + R) \cdot m \end{cases}$$

Marginal fitness  $\omega_{C/I}^{*\varnothing/\sigma}$  and mean fitness  $\bar{\omega}^{\varnothing/\sigma}$  for each sex are functions of genotype fitness (consult SI Eqs.(B.9),(B.10) for explicit expressions). Sex-bias in migration  $m$  is measured by  $R$  (Eq.(1)).

162

163 **The codominant model**

164 If the effect of the incompatibility is additive, such that it is proportional to the  
 165 number of incompatible pairs in a genotype ( $\gamma_1 = \frac{\gamma}{2}$  in Table 2), the model simplifies  
 166 greatly. For the X→A model, in particular,

$$\begin{aligned}\dot{p}_C &= (1 - p_C)\left(\frac{3+D}{3}p_C(\sigma_C^{\circlearrowleft} - \gamma p_I) + \left(1 + \frac{R}{3}\right)m\right) \\ \dot{p}_I &= p_I\left((1 - p_I)\left(\sigma_I^{\circlearrowleft} - \frac{(3+D)}{4}\gamma p_C\right) - m\right)\end{aligned}\tag{5}$$

167 see SI Eqs. (B.34) for the other models.

## 168 Evolutionary histories

169 A parapatric DMI can evolve via different routes, depending on the timing and  
170 geographic location of the origin of the two mutations. Following Bank et al. (2012),  
171 we distinguish five histories: For *secondary contact*, both substitutions occur during  
172 an allopatric phase and can originate in any order. In contrast, if the substitutions  
173 originate in the presence of gene flow, the timing matters and we obtain four further  
174 scenarios: for a *continent-island* DMI we have the first substitution originating on  
175 the continent and the second on the island. Analogously, there are *island-continent*,  
176 *island-island*, and *continent-continent* scenarios. Note that the first two scenarios  
177 lead to *derived-derived DMIs*, with one substitution in each deme, whereas the  
178 last two lead to *derived-ancestral DMIs*, where both substitutions occur in the  
179 same deme. In all cases we refer to the immigrating incompatible allele as the  
180 *continental allele* and to the resident, incompatible allele as the *island allele*. All  
181 five evolutionary histories lead to the same dynamics (as given in **Box 1**) upon  
182 appropriate relabeling of genotypes, where different histories correspond to different  
183 initial conditions (see SI Section B.2.5 and "Mapping of evolutionary histories"  
184 below).

## 185 3 Results

186 Our analytical analysis of the dynamical system in **Box 1** is presented in comprehensive  
187 form in SI B. It comprises on the following steps. For the general model ( $0 \leq \gamma_1 < \gamma$ ),

188 we determine all boundary equilibria and conditions for their stability. Instability  
189 of all boundary equilibria implies a protected polymorphism at both loci. Excluding  
190 cycling behavior, this is a sufficient condition for a globally stable DMI that will  
191 be reached from all starting conditions (all evolutionary histories). An internal  
192 stable equilibrium (DMI) can also coexist with a stable boundary equilibrium. In  
193 this case, the DMI is only locally stable and will only be reached from favorable  
194 starting conditions. Necessary and sufficient conditions for the existence of (locally  
195 or globally) stable DMIs can be derived for weak migration by means of perturbation  
196 analysis: A stable DMI results if the monomorphic boundary equilibrium ( $p_I = 1$ ,  
197  $p_C = 0$ ) is stable for  $m = 0$  and is dragged inside the state space for small  $m > 0$ .  
198 For codominant DMIs, also the internal equilibria can be assessed analytically and  
199 conditions for stable DMIs follow from a bifurcation analysis. For the recessive  
200 DMIs, we complement our analytical results by numerical work to derive stability  
201 conditions for locally stable DMIs under stronger migration.

202 Below, we summarize the key results for the general model. This is followed by a  
203 detailed analysis of the codominant model. In the supplement we added continuative  
204 results, first for the recessive model in SI Section A.1. Second, SI Section A.2  
205 contains simulation results to assess the effects of linkage disequilibrium (LD), which  
206 is relevant for very strong incompatibilities. Third, we present simulations for finite  
207 populations and analyze how migration limits are affected by genetic drift in SI  
208 Section A.3. Finally, in SI Section A.4 we calculate adaptive substitution rates for  
209 autosomes and X chromosomes with gene flow and derive conditions on dominance  
210 favoring the *faster X-effect*, described by Charlesworth et al. (1987).

### 211 **Stable equilibria: global and local stability of DMIs**

212 The model has three boundary equilibria: A monomorphic state, where the continental  
213 genotype swamps the island, which is always reached for strong migration. Furthermore,  
214 two single locus polymorphisms (SLPs) where one locus is swamped, but the other is

215 maintained polymorphic. There is at most one stable internal equilibrium, corresponding  
216 to a DMI. It can either be globally or locally stable. In the latter case, one of  
217 the boundary equilibria is also locally stable and it depends on the evolutionary  
218 history which equilibrium is reached. We therefore obtain two migration thresholds  
219  $0 \leq m_{\max}^- \leq m_{\max}^+$ :

- 220 • For migration rates  $0 \leq m < m_{\max}^-$ , a globally stable DMI, that is reached for  
221 all evolutionary histories.
- 222 • For migration rates  $0 \leq m_{\max}^- \leq m < m_{\max}^+$ , the dynamics are bistable and  
223 yield a locally stable DMI. Hence, only certain evolutionary histories permit  
224 its evolution, but any existing DMI will be maintained.
- 225 • For migration rate  $m_{\max}^+ \leq m$  no stable DMI exists.

## 226 Mapping of evolutionary histories

227 Every evolutionary history maps to a distinct initial condition (SI Section B.2.5 for  
228 results and proofs). As in Bank et al. (2012), we find three permissive histories that  
229 always result in the evolution of a stable DMI for  $m < m_{\max}^+$ : *secondary contact*,  
230 *island-continent*, and *continent-continent*. In all these cases, the second substitution  
231 occurs in a deme where the incompatible first substitution is not (yet) present.  
232 In contrast, the evolution of a stable DMI in parapatry is more difficult for an  
233 *island-island* or *continent-island* substitution history. Here, the second substitution  
234 needs to invade on the island despite of competition of the incompatible allele. We  
235 need  $m < m_{\max}^-$  for a DMI to originate under these circumstances.

## 236 Necessary conditions for the existence of a stable DMI

237 Based on previous results for the model without migration (Rutschman, 1994) or  
238 without epistasis (Bürger and Akerman, 2011), and in accordance to Bank et al.  
239 (2012), we find that with epistasis and increasing migration a stable DMI can only

240 exist if the island allele is beneficial and its sex-averaged selection coefficient exceeds  
241 migration. Furthermore, any averaged selective advantage of the continental allele  
242 must be outweighed by averaged epistasis. For example for  $X \rightarrow A$ , we obtain  $m < \sigma_I^{\ominus}$   
243 and  $\frac{\sigma_C^{\oplus}}{3} < \frac{\gamma}{2}$ . Consult Eqs. B.29, B.31 and Table B.3 for different terms for each model  
244 and the SI Sections B.1.3, B.1.6 for proofs.

### 245 **3.1 Nuclear codominant DMIs**

246 We obtain full analytical solutions for the maximum migration bounds  $m_{\max}^{\pm}$  (B.2.4).  
247 Below, we discuss how these rates depend on the various genetic architectures, sex  
248 dependence of fitness and migration, and on dosage compensation. Figures 2 and  
249 3 compare the  $m_{\max}^{\pm}$  for the different types incompatibilities among nuclear genes:  
250 DMIs among autosomal genes ( $A \rightarrow A$ ), DMIs among X and autosomes, with either  
251 the incompatible X allele immigrating from the continent ( $X \rightarrow A$ ) or the autosomal  
252 locus ( $A \rightarrow X$ ), and DMIs among two X-linked loci ( $X \rightarrow X$ ). Figure 2 assumes full  
253 dosage compensation of X-linked alleles in males, Figure 3 treats the case without  
254 dosage compensation.

#### 255 **Selection against hybrids and against immigrants**

256 Following Bank et al. (2012), we can distinguish two main selective forces maintaining  
257 a DMI in the face of gene flow. If the continental allele is beneficial on the island  
258 (first column of Fig. 2 and 3), a polymorphism at the respective locus can only be  
259 maintained by hybrid formation and selection against the immigrating allele is due  
260 to hybrid inferiority (“selection against hybrids”). This type of selection will only be  
261 effective as long as the immigrating allele is rare. Once the migration pressure is so  
262 high that the immigrating continental allele is in a majority, incompatibility selection  
263 rather works against the resident allele on the island. Consequently, we expect a  
264 large bistable regime with  $m_{\max}^+ \gg m_{\max}^-$  and a small region with global stability,  
265 as can indeed be seen for all types of DMIs with a beneficial continental allele. Note



266 also that  $m_{\max}^+$  increases with  $\gamma$ , as should be expected if hybrid incompatibility, *i.e.*  
267 epistasis, is the sole cause of (local) stability.

268 In contrast, with a deleterious immigrating allele (third column of Fig. 2 and 3),  
269 a DMI can also be maintained by “selection against immigrants” for small values  
270 of epistasis, or via a combination of the two selective forces (selection against  
271 hybrids and immigrants) with stronger epistasis. If selection against immigrants  
272 predominates, maintenance of the DMI is driven by local adaptation. The fitness  
273 advantage of the resident allele depends on its direct effect and the dynamics will  
274 usually be frequency independent. Therefore we obtain no or only a small bistable  
275 regime, with  $m_{\max}^+ \approx m_{\max}^-$ . For stronger epistasis, selection against hybrids becomes  
276 more important, leading to a relative increase of the bistable regime. The main effect  
277 of epistasis now is that it promotes swamping of the island allele:  $m_{\max}^{+/-}$  decreases  
278 with epistasis. In the case of a neutral immigrating allele, the observed migration  
279 bounds exhibit an intermediate pattern.

## 280 Sex-biased migration

281 To understand the differences among the DMI architectures, we take the case of  
282 full dosage compensation and strict female-biased migration ( $R = 1$ ) as a starting  
283 point (Fig. 2(a)-(c)). In this case, all curves for  $m_{\max}^{\pm}$  for the different models  
284 collapse onto a single one. Indeed, if only females migrate, the number of migrating  
285 X chromosomes and autosomes is equal. Full dosage compensation balances any  
286 direct and epistatic effects of loci with different ploidy levels. Consequently, the  
287 corresponding Eqs. (B.34) differ only by a constant factor.

288 If also males migrate (Fig. 2(d)-(i)) genomic architectures involving an X chromosomes  
289 experience effectively lower migration rates of the X and hence increasing  $m_{\max}^{\pm}$ .  
290 Male-biased migration boosts  $m_{\max}^{\pm}$  most effectively for X→X, as both loci experience  
291 reduced migration pressure. For unbiased migration,  $m_{\max}^+$  of X→X relative to A→A  
292 DMIs increases by  $\frac{4}{3}$  (the autosome-X ratio), and doubles for pure male migration

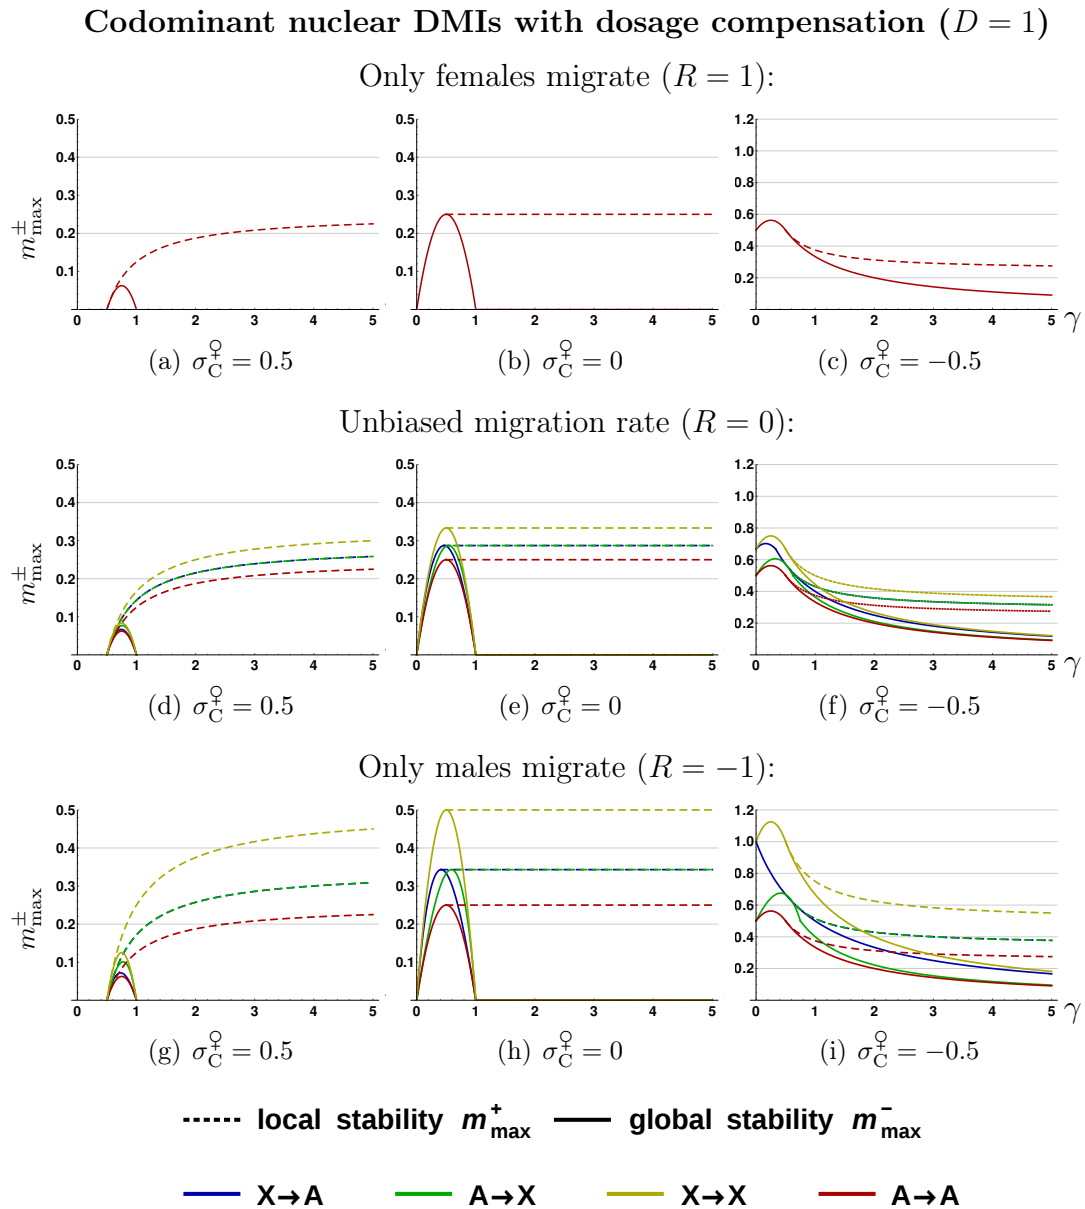

Figure 2: **Codominant nuclear DMIs with dosage compensation,  $D = 1$ .** The columns show  $m_{\max}^{\pm}$  as a function of the strength of epistasis  $\gamma$  for beneficial ( $\sigma_C^{\circ} = 0.5$ ), neutral ( $\sigma_C^{\circ} = 0$ ), and deleterious ( $\sigma_C^{\circ} = -0.5$ ) effect of the immigrating allele. All quantities in the figure ( $\sigma_C^{\circ}$ ,  $\gamma$ ,  $m_{\max}^{\pm}$ ) are measured relative to the fitness effect of the island allele, which is normalized to  $\sigma_I^{\circ} = 1$ . Note the different scaling of the y-axis in the third column. Strong differences between  $m_{\max}^{\pm}$  in the various models occur if migration rates are sex-biased. For female-biased migration  $m_{\max}^{\pm}$  coincide for all four models. With increasing proportion of male migrants (top to bottom), migration pressure on the X chromosome is reduced and differences among the models appear. All bounds  $m_{\max}^{\pm}$  are derived analytically, see Eqs.(B.40),(B.42).

293 (corresponding to the 1:2 X-autosome ratio among migrants in this case).

294 The migration bounds  $m_{\max}^{\pm}$  for the A→X and X→A DMIs are intermediate  
295 between the A→A and X→X DMIs. Our analytical results (see B.2) show that the  
296 upper limit of the bistable regime (*i.e.*, the value of  $m_{\max}^+$ ) is identical for the A→X  
297 and the X→A models with dosage compensation. However, the limits for global  
298 stability,  $m_{\max}^-$ , can differ, which can be understood as follows:

299 For pure selection against migrants (no epistasis  $\gamma \rightarrow 0$ , and  $\sigma_C < 0$ , right column  
300 in Fig. 2), increased male migration reduces the effective migration pressure on the  
301 X chromosome. This leads to a corresponding increase in the migration bound  $m_{\max}^-$   
302 ( $= m_{\max}^+$  in this case) for all DMIs that are lost for  $m > m_{\max}^{\pm}$  because of swamping  
303 at an X-locus. This is clearly always the case for X→X DMIs, but also for the  
304 X→A model, as long as  $|\sigma_C| < |\sigma_I|$  (as in our example: X fixes before A is lost).  
305 In contrast, for the A→A and the A→X model (if  $|\sigma_C| < |\sigma_I|$ ) the DMI is lost due  
306 to swamping at the autosomal locus (continental locus in these cases). Increased  
307 male bias in migration therefore does not change the migration bound  $m_{\max}^{\pm}$  in these  
308 cases.

309 For strong epistasis (with a deleterious immigrating allele), where the direct locus  
310 effects are less important, it is always the incompatible island allele that cannot  
311 invade on the island for migration rates  $m > m_{\max}^-$ . Here, any incompatible island  
312 allele that interacts with an X allele has an advantage from male-biased migration  
313 since it feels less gene flow from the competing X. This can be seen for the  $m_{\max}^-$   
314 lines in Figure 2(f),(i): While the migration bound is increased for the X→A model  
315 (and the X→X model) over the whole range of epistasis, it converges to the value  
316 of the autosomal DMI for the A→X model.

### 317 **No dosage compensation**

318 In Figure 3 we investigate migration bounds without dosage compensation, such  
319 that the differences in ploidy between autosomes and X chromosomes are no longer

320 masked. Relative to the model with dosage compensation, we have weaker allelic  
 321 and epistatic effects of the X chromosome. Hence, incompatible island X alleles  
 322 are easier go get swamped and also have a more difficult time to keep incompatible  
 323 continental (A or X) alleles from swamping.

### Codominant nuclear DMIs without dosage compensation ( $D = 0$ )

Only females migrate ( $R = 1$ ):

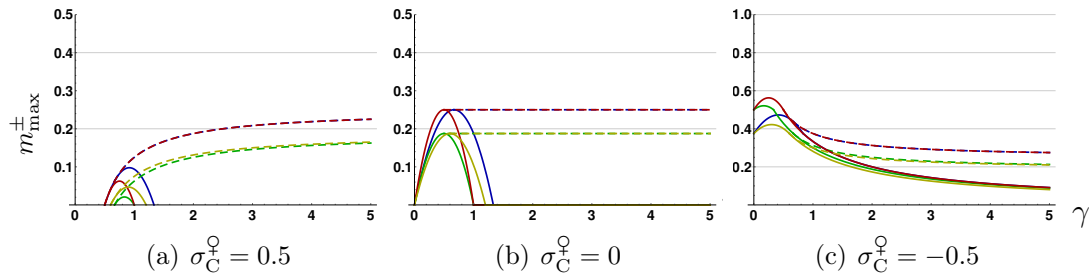

Unbiased migration rate ( $R = 0$ ):

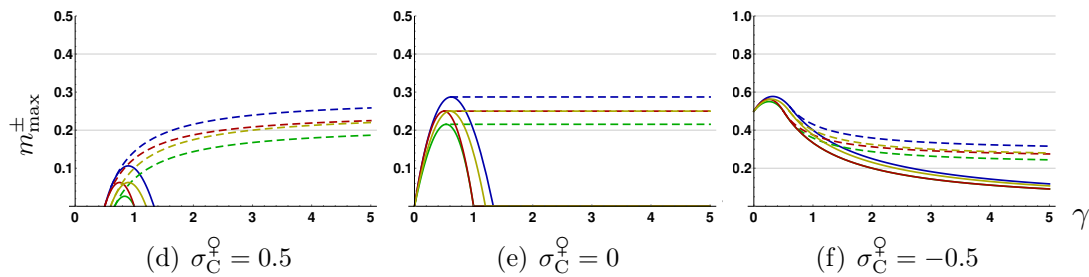

Only males migrate ( $R = -1$ ):

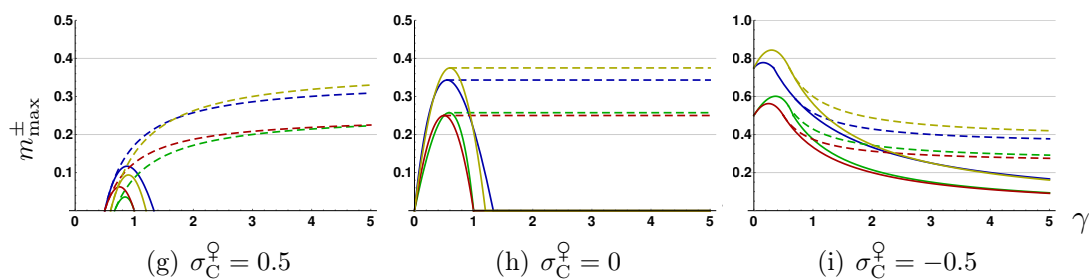

----- local stability  $m_{\max}^+$     ——— global stability  $m_{\max}^-$   
 ———  $X \rightarrow A$       ———  $A \rightarrow X$       ———  $X \rightarrow X$       ———  $A \rightarrow A$

Figure 3: **Codominant nuclear DMIs without dosage compensation,  $D = 0$ .** Without dosage compensation the ploidy differences between the autosomes and the X chromosome are unmasked, inducing strong asymmetry between the  $\mathcal{A}$ - $\mathcal{X}$ -models. this leads to a larger effect per allele. All bounds  $m_{\max}^{\pm}$  are derived analytically, see Eqs.(B.40),(B.42). See also Figure 2 for further explanations. Note the different scaling of the y-axis in the third column.

324 The consequences can most easily be seen in the first row of Figure 3(a)-(c)  
325 with pure female migration, where, in contrast to dosage compensation, differences  
326 between the various genomic architectures are not compensated anymore. We  
327 observe a strong asymmetry between  $m_{\max}^{\pm}$  of X→A and A→X-models for all levels  
328 of male migration relative to the corresponding results with dosage compensation.  
329 Here migration bounds for X→A always exceed those obtained for A→X-models.  
330 Intuitively, one can understand this as follows: In the X→A model, three immigrating  
331 X chromosomes “fight” against four resident autosomes, whereas in A→X the odds  
332 are in favor of the immigrating autosomes. Thus the island is swamped more easily  
333 in the latter case.

334 As seen for dosage compensation before, for weak epistasis ( $\gamma \approx 0$ , pure “selection  
335 against immigrants”), it is always the locus with weaker direct effect that is swamped  
336 first. In our example this is always the “continental” locus, because we have stronger  
337 selection on the island locus. For unbiased migration (Fig. 3(f)) all models converge  
338 to the same bound. However, introducing sex-biased migration leads to relative  
339 higher gene flow on the X for a female bias (and therefore lower bounds for models  
340 with immigrating X), as can be seen in Figure 3(c). Similarly, male-biased migration  
341 leads to weaker X-linked gene flow and a higher bounds in these models, *i.e.* X→A  
342 and X→X, (Fig. 3(i)).

343 If we compare migration bounds of Figure 2 and 3, we can see that dosage  
344 compensation outbalances most of the differences in  $m_{\max}^{\pm}$  between A→X and X→A,  
345 especially for local stability. While dosage compensation strengthens the fitness  
346 effect of the island allele in A→X, the increased epistatic pressure on the continental  
347 allele in X→A is outbalanced by its increased fitness effect.

### 348 3.2 Cytonuclear (mitochondrial) codominant DMIs

349 Finally, we investigate cytonuclear DMIs in Figure 4, where a gene in the haploid  
350 mitochondrial genome (termed o/O for organelle) is incompatible with a nuclear

351 locus. Dosage compensation of the X chromosome again means that the male  
352 XyO-hybrids suffer as much as the female XXO-hybrids while they suffer only as  
353 much as XxO hybrids without dosage compensation. Relative to nuclear DMIs,  
354 three main effects lead to changes in  $m_{\max}^{\pm}$ :

355 First, the cytoplasmic locus experiences effectively stronger direct and epistatic  
356 selection (factor two in Eqs. (B.34c)), because we maintain the per locus effect  
357 identical to nuclear loci. Since a single allele already accounts for the full mitochondrial  
358 locus effect this leads to a larger effect per allele. As a consequence,  $m_{\max}^{\pm}$  without  
359 sex-bias in migration is elevated relative to A→A model (gray lines in Fig. 4(a)-(c)).

360 Second, sex-biased migration has an even stronger effect in cytonuclear DMIs  
361 than in the X-linked nuclear DMIs: Since mitochondria are maternally inherited, the  
362 effective gene flow for mitochondrial loci is reduced to zero with pure male migration.  
363 Consequently, all migration bounds with immigrating incompatible mitochondrial  
364 genes diverge to infinity. In Figure 4 (last two rows), we study the case of strong,  
365 but not complete male bias ( $R = -0.9$ ). Since the migration pressure on the  
366 mitochondrial locus and the X chromosome is reduced, migration bounds  $m_{\max}^{\pm}$   
367 increase for all cytonuclear DMIs, especially for those also involving X chromosomes.  
368 This increase in  $m_{\max}^{\pm}$  is even further promoted by dosage compensation, strengthening  
369 the effect of X.

370 Finally, because of strict maternal inheritance, the dynamics of the mitochondrial  
371 locus is not influenced by any fitness effects in males. In  $\mathcal{X}\text{-}\mathcal{O}$  models this also entails  
372 that dosage compensation only affects the dynamics of the X-locus - in contrast  
373 to nuclear DMIs, where also autosomal loci are affected if they interact with a  
374 hemizygous X locus. As a consequence, the boosting effect of dosage compensation  
375 on  $m_{\max}^{\pm}$  is symmetric for O→X and X→O, in stark contrast to nuclear DMIs, where  
376 dosage compensation does not change much for X→A while it strongly increases  
377 A→X.

### Codominant cytonuclear (mitochondrial) DMIs

Unbiased migration ( $R = 0$ ) without dosage compensation ( $D = 0$ ):

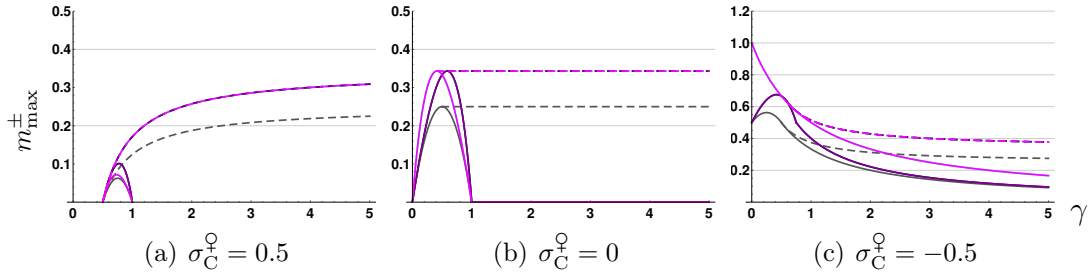

Unbiased migration ( $R = 0$ ) with dosage compensation ( $D = 1$ ):

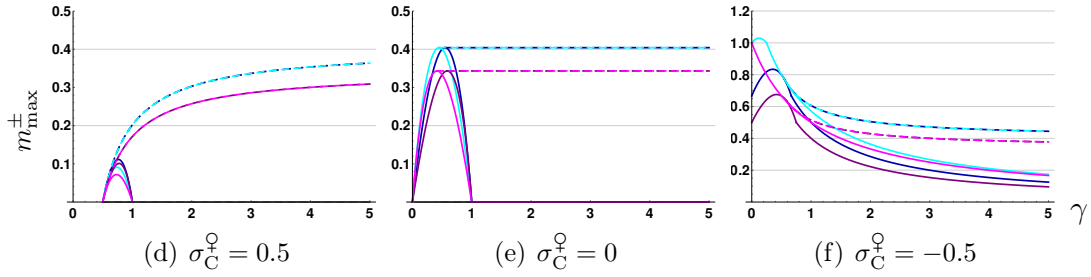

Male dominated migration ( $R = -0.9$ ) without dosage compensation ( $D = 0$ ):

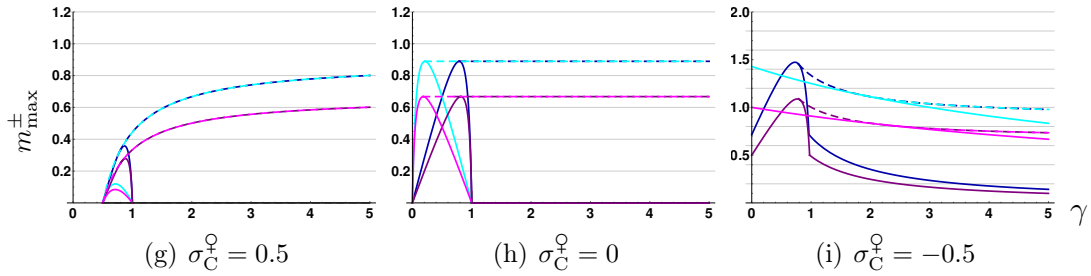

Male dominated migration ( $R = -0.9$ ) with dosage compensation ( $D = 1$ ):

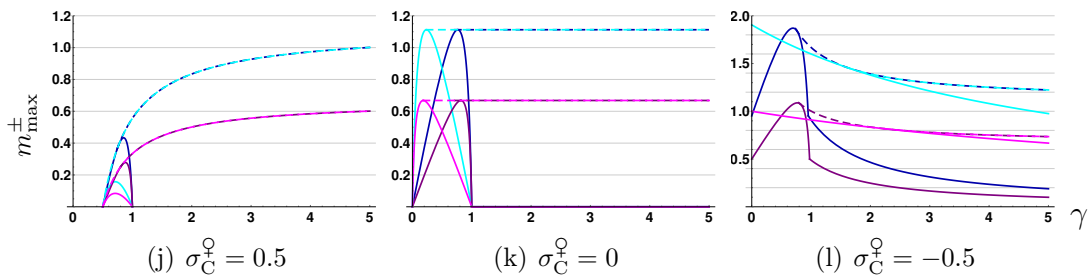

----- local stability  $m_{\max}^+$       ——— global stability  $m_{\max}^-$   
— X→O      — O→X      — A→O      — O→A

Figure 4: **Codominant cytonuclear DMIs.** Maximum permissible migration rates for local stability either coincide for all models (a)-(c), or just for X→O and O→X as well as for O→A and A→O in all other cases. Migration bounds for global stability only coincide without dosage compensation or sex-biased migration between O→X and O→A, as well as for X→O and A→O. The A→A model is given in panel (a)-(c) in gray as a reference. All bounds  $m_{\max}^{\pm}$  are derived analytically, see Eqs.(B.40),(B.42). See Figure 2 for further explanations. Note the different scaling of the y-axis in third column.

## 378 4 Discussion

379 If barriers to gene flow build up among populations in primary or secondary contact,  
380 this can have important consequences for their genetic architecture. A lot of recent  
381 interest has focused on *islands of speciation (or divergence)* (Wu, 2001; Turner  
382 et al., 2005; Butlin et al., 2012; Nosil, 2012; Nosil and Feder, 2012; Via, 2012),  
383 yet corresponding empirical findings are equivocal on that matter (Cruickshank  
384 and Hahn, 2014; Pennisi, 2014). There are, however, several clear and undisputed  
385 genomic patterns of speciation, on which we concentrate here. The most widely  
386 known ones are Haldane's rule, (Haldane, 1922), which has motivated much previous  
387 speciation research (see reviews and examples in Coyne and Orr (2004); Presgraves  
388 (2008); Lachance and True (2010); Presgraves (2010); Oka and Shiroishi (2013)  
389 and the *large X-effect* (reviewed in Presgraves, 2008), which both highlight an  
390 important role of the X chromosome (or the Z chromosome in birds) in speciation. In  
391 addition, hybrid incompatibilities are frequently observed also between nuclear and  
392 cytoplasmic markers. Plants show incompatibilities with plastid genomes (Greiner  
393 et al., 2011; Snijder et al., 2007) and mitochondria have been reported to be incompatible  
394 with nuclear genes across a wide range of species (Ellison and Burton, 2008; Lee  
395 et al., 2008; Burton and Barreto, 2012). In insects, cytoplasmic incompatibilities  
396 can also be caused by infections with the intracellular bacterium *Wolbachia* (O'Neill  
397 et al., 1992; Werren, 1997; Coyne and Orr, 2004).

398 In the current study we investigate how the genetic architecture of an initial  
399 hybrid incompatibility between incipient sister species can maintain divergence in  
400 the presence of ongoing gene flow. Can (primary or secondary) gene flow favor  
401 X-linked or cytonuclear DMIs over autosomal ones, and if so under which conditions?  
402 We studied this question about a possible first step towards speciation using a  
403 minimal model of a two-locus DMI in a continent-island population that allows  
404 for analytical treatment. We derive maximum permissible migration bounds which



405 still permit maintenance of a DMI in the face of gene flow. Conditions that yield  
406 increased migration limits facilitate speciation, as they are lost less easily and can  
407 subsequently provide more persistent seeds for further ongoing differentiation.

## 408 **Conditions for parapatric DMIs**

409 Like in the autosomal case (Bank et al., 2012), the origin and maintenance of  
410 a two-locus X-linked or cytonuclear DMI requires that at least one of the DMI  
411 substitutions (namely: the incompatible variant on the island) is adaptive. If  
412 multi-locus barriers to gene flow build up gradually from initial two-locus incompatibilities,  
413 this confirms that postzygotic parapatric speciation requires at least some degree  
414 of ecological differentiation and local adaptation. Empirically, there is widespread  
415 evidence for positive selection on genes involved in DMIs (Macnair and Christie,  
416 1983; Ting et al., 1998; Presgraves et al., 2003; Barbash et al., 2004; Dettman et al.,  
417 2007).

418 For all types of DMIs, we observe two basic selective forces driving their evolution.  
419 Selection against immigrants implies that the new migrants have a fitness deficit  
420 relative to island residents, resulting in *ecological speciation* scenarios (Schluter and  
421 Conte, 2009; Nosil, 2012). A characteristic of this regime is that evolution of a stable  
422 DMI is independent of its evolutionary history.

423 Alternatively, a stable DMI is caused by selection against hybrids, where migrants  
424 can even have a positive fitness. If hybrids are unfit, immigrants still suffer an  
425 indirect disadvantage as long as they are rare and their genotypes are readily  
426 broken down by sex and recombination. This scenario typically leads to a bistable  
427 dynamics, where a stable DMI will only evolve from favorable starting conditions  
428 or permissive evolutionary histories (such as secondary contact). The scenario has  
429 also been referred to as *mutation-order-speciation* (Mani and Clarke, 1990).

430 We measure the strength of a parapatric DMI by means of two migration bounds.  
431 The higher one,  $m_{\max}^+$ , is the limit beyond which a DMI can neither evolve nor an

432 existing one can be maintained. The lower bound,  $m_{\max}^-$ , is the limit up to which  
433 a DMI will always evolve in the face of gene flow, irrespective of the evolutionary  
434 history (globally stable DMI). For migration rates between both bounds, a DMI is  
435 maintained, but will evolve only under favorable histories, such as secondary contact,  
436 or if the second incompatible substitution occurs on the continent.

## 437 **Contrasting different DMI architectures**

438 We find that the genetic architecture of a DMI (with incompatible genes on autosomes,  
439 X chromosomes, or in the mitochondrial genome) can have a strong effect on its  
440 stability. However, this effect also crucially depends on other factors, such as, in  
441 particular, the level of dosage compensation and the sex-bias in the migration rates.

442 First, without dosage compensation and without sex-biased gene flow, the hemizyosity  
443 of the X chromosome in males leads to shifts of  $m_{\max}^\pm$  in the presence of epistasis  
444 compared to autosome-autosome DMIs. This is due to ploidy differences: “3 X  
445 chromosomes fight 4 autosomes”. Therefore, the A→X scenario (where a resident  
446 X-linked allele competes with an immigrating incompatible autosomal gene) constitutes  
447 a weaker barrier to gene flow than the X→A model. Note that this effect depends  
448 crucially on the (negative) epistasis of the DMI and is not observed in a single-locus  
449 model of local adaptation. Second, dosage compensation strengthens the X alleles,  
450 which leads to higher migration bounds in all X-linked DMIs. In particular, it  
451 increases stability of DMIs with an incompatible X locus on the island, compensating  
452 the A→X versus X→A asymmetry. Third, sex-biased migration leads to lower/higher  
453 limits for DMIs with immigrating X for female/male bias. Fourth, our results in the  
454 SI Section A.1 show no large difference between codominant and recessive nuclear  
455 DMIs (which lead to Haldane’s rule) concerning the migration bounds. In fact, the  
456 difference for X-linked DMIs are even smaller than for autosome-autosome DMIs.  
457 Fifth, for cytonuclear DMIs we often observe stronger barriers to gene flow since the  
458 haploid cytoplasmic alleles experience the full locus effect. Furthermore, sex-bias

459 in migration yields an especially strong effect, as for pure male migration effective  
460 gene flow at the mitochondrial locus ceases completely.

461 Our numerical simulations for the effect of LD in the SI Section A.2 agree with  
462 the approximate analytical results for weak and moderately strong DMIs. For very  
463 strong DMIs, stronger deviations occur for codominant  $A \rightarrow A$  and  $X \rightarrow X$  DMIs,  
464 which maintain very strong LD once all (male and female) hybrids with incompatible  
465 alleles are almost inviable/infertile. As a consequence, gene flow among the continent  
466 and island haplotypes is blocked and we obtain higher migration bounds relative  
467 to  $X \rightarrow A$  and  $A \rightarrow X$  DMIs. For the latter two, F1 hybrid males carrying the  
468 compatible  $x$  allele (genotype  $Aaxy$ ) are viable and can produce  $ax$  gametes for  
469 the F2 generation. This effect of extreme LD and blocked gene flow does not exist  
470 for recessive DMIs (see SI Section A.1 for details). Our numerical simulations also  
471 show that the effect of drift is usually small and does not lead to qualitative changes  
472 (SI Section A.3). Since DMI alleles can be lost by drift, stochastic migration bounds  
473  $m_{\max}^N$  are generally smaller than their deterministic counterparts. In SI Section A.3,  
474 we present an analytical approximation to estimate this reduction due to drift.

### 475 ***The large X-effect***

476 Summarizing all different cases described above, we find that the most stable DMIs  
477 are almost always X-linked, where migration bounds are typically enhanced by a  
478 factor of  $4/3$  to  $2$  relative to autosomal DMIs (unless migration is strongly female  
479 biased). Although this is not a very strong effect, it is very general and applies  
480 whenever gene flow plays a role at any stage of the speciation process. This includes,  
481 in particular, scenarios of secondary contact and also later stages of the speciation  
482 process where additional barriers to gene flow exist in the genomic background.  
483 In this latter case, the gene flow at the focal DMI loci needs to be replaced by  
484 appropriate effective migration rates (Barton and Bengtsson, 1986). The pattern  
485 that follows from a more stable X barrier is consistent with a higher density of

486 X-linked hybrid incompatibilities, the *large X-effect*.

487 Our results show a clear boost of X migration bounds, in particular, if there is  
488 dosage compensation and if migration is male biased. Empirical studies show that  
489 sex-biased migration is common in nature and report a prevalence for migration  
490 of the heterogametic sex in both mammals, where dispersal is on average male  
491 biased, (Lawson Handley and Perrin, 2007) and in birds, where female dispersal  
492 dominates (Greenwood, 1980). In the context of our results, these trends strengthen  
493 the predicted pattern of a *large X-effect* or *large Z-effect*, respectively.

494 One example stems from the house mouse, *Mus musculus*. There is strong  
495 empirical evidence for a *large X-effect* in this species (Tucker et al., 1992; Good  
496 et al., 2008; White et al., 2012), such as the major involvement of the X chromosome  
497 in hybrid sterility (Oka et al., 2004; Storchova et al., 2004). Mice exhibit rather  
498 complete dosage compensation due to X-inactivation in females (Payer and Lee,  
499 2008). Furthermore, the house mouse displays male-biased dispersal at breeding  
500 age (Greenwood, 1980; Gerlach, 1990).

501 Several alternative mechanisms as potential underlying causes for a *large X-effect*  
502 have been discussed in the literature, such as sex ratio meiotic drive, regulation of  
503 the X chromosome in the male germ line (Coyne and Orr, 2004; Presgraves, 2008), or  
504 faster evolution of the X chromosome (termed *faster-X-effect* Charlesworth et al.,  
505 1987). In the panmictic population model by Charlesworth et al. (1987), faster  
506 evolution on the X chromosome results if adaptations are, on average, recessive  
507 and are thus exposed to stronger selection on the hemizygous X. We note that our  
508 model with gene flow predicts an advantage of X-linked genes for island adaptations  
509 even if they are not recessive, but codominant (or even slightly dominant, see SI  
510 Section A.4 for details and proofs). Since the *faster X-effect* (more adaptations on  
511 the X) also favors a *larger X-effect* (more incompatibilities involving the X), this  
512 is another way how speciation with gene-flow can contribute to this pattern. In  
513 summary a mono-causal explanation for the *large X-effect* seems unlikely, and it

514 remains an open question, to which extent each factor contributes. Our study adds  
515 differentiation under gene flow as another element to this mix.

516 Our results relate to Haldane’s rule only in so far as this pattern partially overlaps  
517 with the *large X-effect*. Beyond that, we do not obtain a prediction. In particular,  
518 the migration bounds for codominant and recessive DMIs are similar (while only the  
519 latter lead to Haldane’s rule).

## 520 **Introgression patterns**

521 A second conclusion from our results that can be related to data is that X-linked  
522 alleles in an incompatibility face stronger barriers to introgression than the corresponding  
523 autosomal alleles. This effect rests on two basic observations: the tendency for  
524 higher migration bounds of all X-linked DMIs with dosage compensation (which  
525 also contributes to a large X-effect), and the asymmetry promoting  $A \rightarrow X$  over  $X \rightarrow A$   
526 introgression that we observe for the incompatible allele if dosage compensation is  
527 incomplete or absent (the 3 versus 4 chromosomes effect). Our findings agree with  
528 the result of a recent simulation study for DMIs on a cline by Wang (2013), who  
529 showed that, for an X-autosome DMIs, the incompatible X allele flows less easily  
530 across a cline than the autosomal allele.

531 A pattern of reduced X-introgression relative to autosomal introgression has been  
532 recognized in many sister-species in nature. In the complex of *Anopheles gambiae*  
533 sister clades Fontaine et al. (2015) found “pervasive autosomal introgression” between  
534 different species, in contrast to the X chromosome, which contains disproportionately  
535 more factors in reproductive isolation.

536 Liu et al. (2015) report three interspecies hybridization events in mice (*Mus*  
537 *musculus domesticus* and *M. spretus*), leading to exclusively autosomal, partially  
538 adaptive introgression. Similarly, Macholán et al. (2007) showed weaker introgression  
539 patterns and lower selection pressure on the X chromosomes compared to the autosomes  
540 in the central European mouse hybrid zone of *Mus musculus musculus* and *M.*

541 *m. domesticus*. The authors suppose that the X is shielded more effectively from  
542 introgression due to the *large X-effect*.

543 Further examples exist for birds. Sætre et al. (2003) report “rather extensive  
544 hybridization and backcrossing in sympatry” between two populations of flycatchers  
545 hybridizing in secondary contact. Nevertheless, gene flow was again predominantly  
546 found on the autosome. Hooper and Price (2015) report that derived cross-species  
547 inversions among sister species of Estrilid finches are strongly enriched on the Z  
548 chromosome. The pattern is strongest in continental clades with high level of  
549 sympatry and (plausibly) higher levels of gene-flow during the speciation process. If  
550 inversions harbor DMIs, this is consistent with our finding that derived incompatibilities  
551 on the Z chromosome are more stable to gene flow than autosomal incompatibilities.

552

553 Also other factors, such as recombination, can influence differential introgression  
554 on X chromosomes and autosomes. Indeed, there is empirical evidence that recombination  
555 can structure autocorrelation patterns among introgressed loci. However, available  
556 data also show that recombination cannot be the the sole explanation for differential  
557 introgression among genomic regions, e.g. in mice (Payseur et al., 2004) or finches (Hooper  
558 and Price, 2015). As for the *large X-effect* our mechanism is one of several possible  
559 ones.

## 560 **Biological assumptions and limitations of the model**

561 Our study has been intended as a minimal model approach that allows for analytical  
562 treatment. As such, it rests on several simplifying assumptions concerning the  
563 genetics of the DMI and the ecological setting. These limitations suggest possible  
564 model extensions for future work.

565 All our results assume a simple DMI between just two loci. This is in line with  
566 most previous theoretical work and known empirical cases (Coyne and Orr, 2004;  
567 Maheshwari and Barbash, 2011). Nevertheless, complex DMIs involving multiple

568 loci are clearly relevant at later stages of a speciation process and could lead to new  
569 effects that are not captured here (*e.g.* Lindtke and Buerkle, 2015).

570 Our fitness scheme for two-locus DMIs comprises codominant and recessive  
571 cases. Empirically, the functional form depends on the underlying mechanisms  
572 causing hybrid fitness loss, which is still debated. Hybrid incompatibilities can  
573 be due to loss-of-function or gain-of-function mutations (reviewed by Maheshwari  
574 and Barbash, 2011). While the former tend to act recessively, the latter will likely  
575 affect heterozygotes, and may be better captured by a partially dominant DMI.

576 Recessive DMIs, in turn, occur in a number of different types, (*e.g.* Presgraves,  
577 2010; Cattani and Presgraves, 2012; Matsubara et al., 2015), which lead to slightly  
578 different models. We have briefly studied some of these alternatives analytically, such  
579 as a *recessive-A codominant-X*-DMI or a *codominant-A recessive-X*-DMI (data not  
580 shown). We did not detect any noteworthy difference in their evolutionary dynamics  
581 or for the migration bounds relative to the results reported here. Still, more relevant  
582 changes are clearly possible, for example if the single locus effects can lead to over-  
583 or underdominance.

584 For the results presented, we assume that dosage compensation enhances not only  
585 the single-locus effect, but also the incompatibility. Empirically, hybrid incompatibilities  
586 are frequently dosage-sensitive, *e.g.* in a *Arabidopsis thaliana*/*A. arenosa* cross,  
587 where a DMI results due to failure in gene silencing Josefsson et al. (2006), or in  
588 a *Mus musculus musculus*/*M. m. domesticus* cross, where X-linked hybrid male  
589 sterility results from over-expression of X-linked genes in spermatogenesis (Good  
590 et al., 2010). Furthermore, in haplo-diploid Nasonian wasps genetically engineered  
591 diploid males were less affected by hybrid sterility than haploid male hybrids, pointing  
592 to a strong effect of ploidy on hybrid fertility Beukeboom et al. (2015).

593 Nevertheless, we also investigated the effect of dosage compensation only on the  
594 single locus effect or only on the incompatibility (results not shown). As expected,  
595 we obtain intermediate patterns between no and full dosage compensation.

596 Concerning the ecological assumptions, our model assumes unidirectional gene  
597 flow between two panmictic demes. While our results readily extend to weak back  
598 migration (which leads only to slight shifts of the equilibria), strong bidirectional  
599 migration can lead to qualitatively new effects that are not captured by our framework.  
600 For example, polymorphisms at single loci can be maintained for arbitrarily strong  
601 gene flow if heterogeneous soft selection leads to a rare-type advantage (Levene,  
602 1953). Furthermore, generalist genotypes that are inferior in both demes, but do well  
603 on average, can be maintained if (and only if) bidirectional migration is sufficiently  
604 strong (see Akerman and Bürger, 2014, for results in a two-locus model without  
605 epistasis).

606 Alternative models for the population structure can also lead to substantial  
607 differences. In particular, our two-deme model ignores isolation by distance, which  
608 can be captured either in a discrete cline model with a chain of demes, or in a  
609 continuous-space framework. It is expected that polymorphisms (and DMIs) can  
610 be maintained with much larger gene flow (or weaker selection) in these settings  
611 (Barton, 2013). Still, several of our key results, such as reduced introgression of  
612 X-linked incompatibility alleles, should still hold under these conditions (see Wang,  
613 2013, for a discrete cline model).

## 614 **5 Acknowledgements**

615 We thank Andrea Betancourt, Alexandre Blanckaert, Reinhard Bürger, Brian Charlesworth,  
616 Andy Clark, Sebastian Matuszewsky, Sylvain Mousset, Mohamed Noor, Sally Otto, Christian  
617 Schlötterer, Maria Servedio, Derek Setter, Claus Vogl and three referees for helpful discussions,  
618 suggestions and comments on the manuscript. This work was made possible with financial  
619 support by the Austrian Science Fund (FWF) via funding for the Vienna Graduate School  
620 for Population Genetics.



## 621 References

- 622 Agrawal, A., Feder, J., and Nosil, P. (2011). Ecological divergence and the origins of  
623 intrinsic postmating isolation with gene flow. *International Journal of Ecology*, 2011.
- 624 Akerman, A. and Bürger, R. (2014). The consequences of gene flow for local adaptation  
625 and differentiation: a two-locus two-deme model. *Journal of mathematical biology*,  
626 68(5):1135–1198.
- 627 Bank, C., Bürger, R., and Hermisson, J. (2012). The limits to parapatric  
628 speciation: Dobzhansky–Muller incompatibilities in a continent–island model. *Genetics*,  
629 191(3):845–863.
- 630 Barbash, D., Awadalla, P., and Tarone, A. (2004). Functional divergence caused by ancient  
631 positive selection of a *Drosophila* hybrid incompatibility locus. *PLoS biology*, 2:839–848.
- 632 Barnard-Kubow, K. B., So, N., and Galloway, L. F. (2016). Cytonuclear incompatibility  
633 contributes to the early stages of speciation. *Evolution*, 70(12):2752–2766.
- 634 Barton, N. (2013). Does hybridization influence speciation? *Journal of evolutionary*  
635 *biology*, 26(2):267–269.
- 636 Barton, N. and Bengtsson, B. (1986). The barrier to genetic exchange between hybridising  
637 populations. *Heredity*, 57(3):357–376.
- 638 Bateson, W. (1909). Heredity and variation in modern lights. *Darwin and modern science*,  
639 85:101.
- 640 Beukeboom, L., Koevoets, T., Morales, H. E., Ferber, S., and van de Zande, L. (2015).  
641 Hybrid incompatibilities are affected by dominance and dosage in the haplodiploid wasp  
642 *Nasonia*. *Frontiers in Genetics*, 6:14.
- 643 Bürger, R. and Akerman, A. (2011). The effects of linkage and gene flow on local  
644 adaptation: A two-locus continent–island model. *Theoretical population biology*,  
645 80(4):272–288.

- 646 Burton, R. and Barreto, F. (2012). A disproportionate role for mtDNA in  
647 Dobzhansky–Muller incompatibilities? *Molecular Ecology*, 21(20):4942–4957.
- 648 Butlin, R., Debelle, A., Kerth, C., Snook, R., Beukeboom, L., Castillo, C., Diao, W.,  
649 Maan, M., Paolucci, S., Weissing, F., et al. (2012). What do we need to know about  
650 speciation? *Trends in Ecology & Evolution*, 27(1):27–39.
- 651 Cattani, M. and Presgraves, D. (2012). Incompatibility Between X Chromosome Factor and  
652 Pericentric Heterochromatic Region Causes Lethality in Hybrids Between *Drosophila*  
653 *melanogaster* and Its Sibling Species. *Genetics*, 191(2):549–559.
- 654 Charlesworth, B., Coyne, J., and Barton, N. (1987). The relative rates of evolution of sex  
655 chromosomes and autosomes. *American Naturalist*, pages 113–146.
- 656 Corbett-Detig, R., Zhou, J., Clark, A., Hartl, D., and Ayroles, J. (2013). Genetic  
657 incompatibilities are widespread within species. *Nature*, 504(7478):135–137.
- 658 Coyne, J. and Orr, H. (1989). Two rules of speciation. *Speciation and its Consequences*,  
659 pages 180–207.
- 660 Coyne, J. and Orr, H. (2004). *Speciation*. Sinauer Associates Sunderland, MA.
- 661 Cruickshank, T. and Hahn, M. (2014). Reanalysis suggests that genomic islands of  
662 speciation are due to reduced diversity, not reduced gene flow. *Molecular Ecology*,  
663 23(13):3133–3157.
- 664 Dettman, J., Sirjusingh, C., Kohn, L., and Anderson, J. (2007). Incipient speciation by  
665 divergent adaptation and antagonistic epistasis in yeast. *Nature*, 447(7144):585–588.
- 666 Dobzhansky, T. (1936). Studies on hybrid sterility. II. Localization of sterility factors in  
667 *Drosophila pseudoobscura* hybrids. *Genetics*, 21(2):113.
- 668 Ellegren, H. (2009). Genomic evidence for a large-Z effect. *Proceedings of the Royal Society*  
669 *B: Biological Sciences*, 276(1655):361–366.

- 670 Ellegren, H., Hultin-Rosenberg, L., Brunström, B., Dencker, L., Kultima, K., and Scholz,  
671 B. (2007). Faced with inequality: chicken do not have a general dosage compensation  
672 of sex-linked genes. *BMC biology*, 5(1):40.
- 673 Ellison, C. and Burton, R. (2008). Interpopulation hybrid breakdown maps to the  
674 mitochondrial genome. *Evolution*, 62(3):631–638.
- 675 Feder, J. and Nosil, P. (2009). Chromosomal inversions and species differences: when are  
676 genes affecting adaptive divergence and reproductive isolation expected to reside within  
677 inversions? *Evolution*, 63(12):3061–3075.
- 678 Felsenstein, J. (1981). Skepticism towards Santa Rosalia, or why are there so few kinds of  
679 animals? *Evolution*, pages 124–138.
- 680 Fontaine, M., Pease, J., Steele, A., Waterhouse, R. M., Neafsey, D., Sharakhov, I., Jiang,  
681 X., Hall, A., Catteruccia, F., Kakani, E., et al. (2015). Extensive introgression in a  
682 malaria vector species complex revealed by phylogenomics. *Science*, 347(6217):1258524.
- 683 Gavrilets, S. (1997). Hybrid zones with Dobzhansky-type epistatic selection. *Evolution*,  
684 pages 1027–1035.
- 685 Gerlach, G. (1990). Dispersal mechanisms in a captive wild house mouse population (*Mus*  
686 *domesticus* Rutt). *Biological Journal of the Linnean Society*, 41(1-3):271–277.
- 687 Good, J., Dean, M., and Nachman, M. (2008). A complex genetic basis to X-linked hybrid  
688 male sterility between two species of house mice. *Genetics*, 179(4):2213–2228.
- 689 Good, J., Giger, T., Dean, M., and Nachman, M. (2010). Widespread over-expression of  
690 the X chromosome in sterile F1 hybrid mice. *PLoS genetics*, 6(9):e1001148.
- 691 Graves, J., Disteche, C., et al. (2007). Does gene dosage really matter. *J Biol*, 6(1):1.
- 692 Greenwood, P. (1980). Mating systems, philopatry and dispersal in birds and mammals.  
693 *Animal behaviour*, 28(4):1140–1162.
- 694 Greiner, S., Rauwolf, U., Meurer, J., and Herrmann, R. (2011). The role of plastids in  
695 plant speciation. *Molecular ecology*, 20(4):671–691.

- 696 Haldane, J. (1922). Sex ratio and unisexual sterility in hybrid animals. *Journal of genetics*,  
697 12(2):101–109.
- 698 Hooper, D. and Price, T. (2015). Rates of karyotypic evolution in Estrildid finches differ  
699 between island and continental clades. *bioRxiv*, page 013987.
- 700 Josefsson, C., Dilkes, B., and Comai, L. (2006). Parent-dependent loss of gene silencing  
701 during interspecies hybridization. *Current Biology*, 16(13):1322–1328.
- 702 Kimura, M. (1957). Some problems of stochastic processes in genetics. *The Annals of*  
703 *Mathematical Statistics*, pages 882–901.
- 704 Lachance, J. and True, J. (2010). X-autosome incompatibilities in *Drosophila*  
705 *melanogaster*: tests of Haldane’s rule and geographic patterns within species. *Evolution*,  
706 64(10):3035–3046.
- 707 Lawson Handley, L. and Perrin, N. (2007). Advances in our understanding of mammalian  
708 sex-biased dispersal. *Molecular Ecology*, 16(8):1559–1578.
- 709 Lee, H., Chou, J., Cheong, L., Chang, N., Yang, S., and Leu, J. (2008). Incompatibility  
710 of nuclear and mitochondrial genomes causes hybrid sterility between two yeast species.  
711 *Cell*, 135(6):1065–1073.
- 712 Levene, H. (1953). Genetic equilibrium when more than one ecological niche is available.  
713 *American Naturalist*, pages 331–333.
- 714 Lindtke, D. and Buerkle, C. (2015). The genetic architecture of hybrid incompatibilities  
715 and their effect on barriers to introgression in secondary contact. *Evolution*.
- 716 Liu, K., Steinberg, E., Yozzo, A., Song, Y., Kohn, M., and Nakhleh, L. (2015). Interspecific  
717 introgressive origin of genomic diversity in the house mouse. *Proceedings of the National*  
718 *Academy of Sciences*, 112(1):196–201.
- 719 Macholán, M., Munclinger, P., Šugerková, M., Dufková, P., Bímová, B., Božíková, E.,  
720 Zima, J., and Piálek, J. (2007). Genetic analysis of autosomal and X-linked markers  
721 across a mouse hybrid zone. *Evolution*, 61(4):746–771.

- 722 Macnair, M. and Christie, P. (1983). Reproductive isolation as a pleiotropic effect of copper  
723 tolerance in *Mimulus guttatus*. *Heredity*, 50(3):295–302.
- 724 Maheshwari, S. and Barbash, D. (2011). The genetics of hybrid incompatibilities. *Annual*  
725 *review of genetics*, 45:331–355.
- 726 Mallet, J. (2008). Hybridization, ecological races and the nature of species: empirical  
727 evidence for the ease of speciation. *Philosophical Transactions of the Royal Society B:*  
728 *Biological Sciences*, 363(1506):2971–2986.
- 729 Mani, G. and Clarke, B. (1990). Mutational order: a major stochastic process in evolution.  
730 *Proceedings of the Royal Society of London B: Biological Sciences*, 240(1297):29–37.
- 731 Masly, J. and Presgraves, D. (2007). High-resolution genome-wide dissection of the two  
732 rules of speciation in *Drosophila*. *PLoS Biol*, 5(9):e243.
- 733 Matsubara, K., Yamamoto, E., Mizobuchi, R., Yonemaru, J., Yamamoto, T., Kato,  
734 H., and Yano, M. (2015). Hybrid Breakdown Caused by Epistasis-Based Recessive  
735 Incompatibility in a Cross of Rice (*Oryza sativa* L.). *Journal of Heredity*, 106(1):113–122.
- 736 Muller, H. (1942). Isolating mechanisms, evolution and temperature. In *Biological*  
737 *Symposia*, volume 6, pages 71–125.
- 738 Nosil, P. (2012). *Ecological speciation*. Oxford University Press.
- 739 Nosil, P. and Feder, J. (2012). Genomic divergence during speciation: causes and  
740 consequences. *Philosophical Transactions of the Royal Society B: Biological Sciences*,  
741 367(1587):332–342.
- 742 Oka, A., Mita, A., Sakurai-Yamatani, N., Yamamoto, H., Takagi, N., Takano-Shimizu,  
743 T., Toshimori, K., Moriwaki, K., and Shiroishi, T. (2004). Hybrid breakdown caused  
744 by substitution of the X chromosome between two mouse subspecies. *Genetics*,  
745 166(2):913–924.
- 746 Oka, A. and Shiroishi, T. (2013). Regulatory divergence of X-linked genes and hybrid male  
747 sterility in mice. *Genes & genetic systems*, 89(3):99–108.

- 748 O'Neill, S., Giordano, R., Colbert, A., Karr, T., and Robertson, H. (1992). 16S  
749 rRNA phylogenetic analysis of the bacterial endosymbionts associated with cytoplasmic  
750 incompatibility in insects. *Proceedings of the National Academy of Sciences*,  
751 89(7):2699–2702.
- 752 Orr, H. and Turelli, M. (2001). The evolution of postzygotic isolation: accumulating  
753 Dobzhansky-Muller incompatibilities. *Evolution*, 55(6):1085–1094.
- 754 Payer, B. and Lee, J. (2008). X chromosome dosage compensation: how mammals keep  
755 the balance. *Annual review of genetics*, 42:733–772.
- 756 Payseur, B. A., Krenz, J. G., and Nachman, M. W. (2004). Differential patterns of  
757 introgression across the x chromosome in a hybrid zone between two species of house  
758 mice. *Evolution*, 58(9):2064–2078.
- 759 Pennisi, E. (2014). Disputed islands. *Science*, 345(6197):611–613.
- 760 Presgraves, D. (2008). Sex chromosomes and speciation in *Drosophila*. *Trends in Genetics*,  
761 24(7):336–343.
- 762 Presgraves, D. (2010). The molecular evolutionary basis of species formation. *Nature*  
763 *Reviews Genetics*, 11(3):175–180.
- 764 Presgraves, D., Balagopalan, L., Abmayr, S., and Orr, H. (2003). Adaptive evolution  
765 drives divergence of a hybrid inviability gene between two species of *Drosophila*. *Nature*,  
766 423(6941):715–719.
- 767 Rutschman, D. H. (1994). Dynamics of the two-locus haploid model. *Theoretical population*  
768 *biology*, 45(2):167–176.
- 769 Sætre, G., Borge, T., Lindroos, K., Haavie, J., Sheldon, B., Primmer, C., and Syvänen,  
770 A.-C. (2003). Sex chromosome evolution and speciation in *Ficedula* flycatchers.  
771 *Proceedings of the Royal Society of London B: Biological Sciences*, 270(1510):53–59.
- 772 Schluter, D. and Conte, G. (2009). Genetics and ecological speciation. *Proceedings of the*  
773 *National Academy of Sciences*, 106(Supplement 1):9955–9962.

- 774 Slatkin, M. (1987). Gene flow and the geographic structure of natural populations. *Science*,  
775 236:787–792.
- 776 Snijder, R., Brown, F., and van Tuyl, J. (2007). The role of plastome-genome  
777 incompatibility and biparental plastid inheritance in interspecific hybridization in  
778 the genus *Zantedeschia* (Araceae). *Floriculture and Ornamental Biotechnology*,  
779 1(2):150–157.
- 780 Storchova, R., Gregorová, S., Buckiova, D., Kyselova, V., Divina, P., and Forejt, J. (2004).  
781 Genetic analysis of X-linked hybrid sterility in the house mouse. *Mammalian Genome*,  
782 15(7):515–524.
- 783 Sweigart, A. and Flagel, L. (2014). Evidence of Natural Selection Acting on a Polymorphic  
784 Hybrid Incompatibility Locus in *Mimulus*. *Genetics*, pages genetics–114.
- 785 Ting, C., Tsauro, S., Wu, M., and Wu, C. (1998). A rapidly evolving homeobox at the site  
786 of a hybrid sterility gene. *Science*, 282(5393):1501–1504.
- 787 Tucker, P., Sage, R., Warner, J., Wilson, A., and Eicher, E. (1992). Abrupt cline for sex  
788 chromosomes in a hybrid zone between two species of mice. *Evolution*, pages 1146–1163.
- 789 Turelli, M. and Orr, H. (2000). Dominance, epistasis and the genetics of postzygotic  
790 isolation. *Genetics*, 154(4):1663–1679.
- 791 Turner, T., Hahn, M., and S., N. (2005). Genomic islands of speciation in *Anopheles*  
792 *gambiae*. *PLoS biology*, 3(9):e285.
- 793 Via, S. (2012). Divergence hitchhiking and the spread of genomic isolation during ecological  
794 speciation-with-gene-flow. *Philosophical Transactions of the Royal Society B: Biological*  
795 *Sciences*, 367(1587):451–460.
- 796 Via, S. and West, J. (2008). The genetic mosaic suggests a new role for hitchhiking in  
797 ecological speciation. *Molecular Ecology*, 17(19):4334–4345.

- 798 Wang, R. (2013). Gene flow across a hybrid zone maintained by a weak heterogametic  
799 incompatibility and positive selection of incompatible alleles. *Journal of Evolutionary*  
800 *Biology*, pages 386–396.
- 801 Werren, J. (1997). Biology of wolbachia. *Annual review of entomology*, 42(1):587–609.
- 802 White, M., Stubbings, M., Dumont, B. L., and Payseur, B. (2012). Genetics and evolution  
803 of hybrid male sterility in house mice. *Genetics*, 191(3):917–934.
- 804 Wu, C. (2001). The genic view of the process of speciation. *Journal of Evolutionary*  
805 *Biology*, 14(6):851–865.
- 806 Yeaman, S. and Otto, S. P. (2011). Establishment and maintenance of adaptive genetic  
807 divergence under migration, selection, and drift. *Evolution*, 65(7):2123–2129.
